# Supplementary material
Source: PubMed Central journal article supplement (PMC7984275)
Supplement: NIHMS1680556-supplement-SuppText_SuppTables_SuppFigs.pdf [file NIHMS1680556-supplement-SuppText_SuppTables_SuppFigs.pdf]

## Supplementary Information

### Protein folding stability changes across the proteome

#### reveal targets of Cu toxicity in *E. coli*

Nancy Wiebelhaus<sup>1</sup>, Jacqueline M. Zaengle-Barone<sup>1</sup>, Kevin K. Hwang, Katherine J. Franz\*, Michael C. Fitzgerald\*

<sup>1</sup>These authors contributed equally to the work.

\*Corresponding authors: [katherine.franz@duke.edu](mailto:katherine.franz@duke.edu), [michael.c.fitzgerald@duke.edu](mailto:michael.c.fitzgerald@duke.edu)

Department of Chemistry, Duke University, 124 Science Drive, Durham, North Carolina 27708, United States

The supplementary information accompanying this manuscript includes Supplementary Text, 5 Supplementary Tables, 6 Supplementary Figures, and 8 Supplementary Datasets as summarized below:

#### Table of Contents

Supplementary Text | Description of Materials and Methods

Supplementary Table 1 | Proteomic coverage from protein expression level and protein stability analyses.

Supplementary Table 2 | Complete list of protein expression level hits.

Supplementary Table 3 | Complete list of protein stability hits.

Supplementary Table 4 | Biological process classification of protein stability hits.

Supplementary Table 5 | Biological process classification of protein stability hits within each cluster.

Supplementary Figure 1 | Electron paramagnetic resonance spectroscopy of Cu titrated with PT in 10% glycerol.

Supplementary Figure 2 | Experimental workflow and isobaric mass tagging scheme for protein expression analysis.

Supplementary Figure 3 | Experimental workflow and isobaric mass tagging scheme for protein stability analysis.

Supplementary Figure 4 | Heat map visualizing magnitude of expression changes for hit proteins grouped by biological process.

Supplementary Figure 5 | Heat maps visualizing magnitude of stability changes for hit peptides grouped by biological process.

Supplementary Figure 6 | GAPDH and IDH activity in cells treated with PT.

- Supplementary Dataset 1 | Search output and  $\log_2(\text{fold change})$  calculations from LC-MS/MS analyses of the first TMT10-plex labeled sample generated in the protein expression level analyses (i.e., biological replicates 1 and 2).
- Supplementary Dataset 2 | Search output and  $\log_2(\text{fold change})$  calculations from LC-MS/MS analyses of the second TMT10-plex labeled sample generated in the protein expression level analyses (i.e., biological replicates 3 and 4).
- Supplementary Dataset 3 | Search output and  $\log_2(\text{fold change})$  calculations from LC-MS/MS analyses of the first TMT10-plex labeled sample generated in the protein stability analyses (i.e., biological replicates 1 and 2).
- Supplementary Dataset 4 | Search output and  $\log_2(\text{fold change})$  calculations from LC-MS/MS analyses of the first TMT10-plex labeled sample generated in the protein stability analyses (i.e., biological replicates 3 and 4).
- Supplementary Dataset 5 | Hit analysis of overlapping proteins identified in the two TMT10-plex labeled samples generated in the protein expression level analyses (i.e., biological replicates 1-4).
- Supplementary Dataset 6 | Hit analysis of overlapping proteins identified in the two TMT10-plex samples generated in the protein stability analyses (i.e., biological replicates 1-4).
- Supplementary Dataset 7 | Fuzzy c-means cluster analysis of peptide stability hits.
- Supplementary Dataset 8 | DAVID functional analysis and resulting GO biological process classifications of protein expression level hits and proteins corresponding to peptide stability hits.

## SUPPLEMENTARY TEXT

### MATERIALS & METHODS

**Materials.** The following materials were obtained from Sigma Aldrich (St. Louis, MO): dimethyl sulfoxide (DMSO), phenylmethanesulfonyl fluoride (PMSF), S-methylmethanethiosulfonate (MMTS), sodium chloride, ethylenediaminetetraacetic acid (EDTA), urea, centrifugal filter units (Amicon Ultra, 0.5 mL, 10k molecular weight cutoff), tris(hydroxymethyl)aminomethane hydrochloride (Tris-HCl), thermolysin from *Geobacillus stearothermophilus*, trifluoroacetic acid (TFA), triethylammonium bicarbonate buffer (TEAB, 1 M, pH 8.5), LB medium (Lennox), glyceraldehyde-3-phosphate dehydrogenase from rabbit muscle, isocitrate dehydrogenase (NADP) from porcine heart, DL-glyceraldehyde-3-phosphate, DL-isocitric acid trisodium salt hydrate, and  $\beta$ -nicotinamide adenine dinucleotide phosphate sodium salt hydrate. The following materials were obtained from Thermo Fisher Scientific (Waltham, MA): acetonitrile (ACN, LC-MS grade), trace metal-grade nitric acid, TMT10-Plex isobaric label reagent set, NHS-activated agarose dry resin (Pierce), Coomassie Plus Bradford Reagent (Pierce), and porcine pancreas trypsin (proteomics grade). Tris(2-carboxyethyl)phosphine hydrochloride (TCEP) was obtained from Santa Cruz Biotechnology (Dallas, TX). Phosphate-buffered saline (PBS 1x, without calcium or magnesium, pH 7.4) and ethylenediaminetetraacetic acid (EDTA) solution (0.5 M, pH 8.0) were obtained from Corning (Corning, NY). Macrospin columns (silica C18) were obtained from Nest Group (Southborough, MA).  $\beta$ -Nicotinamide adenine dinucleotide and pyriothione were obtained from Chem-Impex International. Copper chloride was obtained from Merck. Incorporation of  $\beta$ -lactamase CTX-M-1 into *E. coli* strain K-12 MG1655 and synthesis of PcephPT (2-((((6R,7R)-2-carboxy-8-oxo-7-(2-phenylacetamido)-5-thia-1-azabicyclo[4.2.0]oct-2-en-3-yl)methyl)thio)pyridine 1-oxide) were described previously.<sup>1</sup>

**Treatment and preparation of *E. coli* for inductively coupled plasma mass spectrometry (ICP-MS).** *E. coli* MG1655 expressing  $\beta$ -lactamase CTX-M-1 was streaked onto LB agar containing 100  $\mu$ g/mL ampicillin and 50  $\mu$ g/mL kanamycin. A single colony was used to inoculate 7–9 mL LB medium containing 100  $\mu$ g/mL ampicillin and 50  $\mu$ g/mL kanamycin, which was then incubated at 37 °C, 200 rpm, for 16–18 h. This overnight culture was diluted 1:100 in LB medium and grown to OD<sub>600</sub> of 0.1–0.2. The culture was then divided into 100 mL aliquots and treated with nothing, 10  $\mu$ M CuCl<sub>2</sub>, 4  $\mu$ M PT, 4  $\mu$ M PcephPT, 10  $\mu$ M Cu + 4  $\mu$ M PT, 10  $\mu$ M Cu + 4  $\mu$ M PcephPT, or 2 mM Cu for 15 min. Then, 5 mL of cell suspension was placed in acid-washed centrifuge tubes and centrifuged at 4000 g, 4 °C for 10 min to pellet. Pellets were washed twice with 1 mL sterile H<sub>2</sub>O and once with 1 mL of 1 mM EDTA to remove extracellular metals, then dried at 80–90 °C overnight. After drying, samples were digested in 30  $\mu$ L of neat trace metal-grade nitric acid at 80–90 °C for 30 min, then allowed to cool. Next, 30  $\mu$ L of chelex-treated water was added to obtain a final nitric acid concentration of 50%. Samples were stored at -20 °C until submission for ICP-MS analysis. Two biological replicates were performed, each with two technical replicates. ICP-MS data were acquired by Kim Hutchison of the North Carolina State University Department of Crop and Soil Sciences using a PerkinElmer Elan DRCII spectrometer. The concentration of Cu per cell was determined by dividing the number of cells in the sample by the volume of an *E. coli* MG1655 cell cultured in LB media ( $3.9 \times 10^{-15}$  L).<sup>2</sup>

**Treatment and preparation of *E. coli* for electron paramagnetic resonance (EPR) spectroscopy.** The growth culture of *E. coli* MG1655 CTX-M-1 was obtained as described above for ICP-MS. Cells were grown to an OD<sub>600</sub> of 0.8–1, divided into 100 mL aliquots, and treated for 15 min. The cells were then centrifuged at 4000 g for 10 min at 4 °C to pellet. Pellets were washed

twice with 5 mL sterile water and once with 5 mL of 1 mM EDTA, then resuspended in 10% glycerol. Hydrogen peroxide (1 M) and hydroxylamine (1 mM) were added to one set of the samples to allow comparison between oxidized and unoxidized metal content. Hydroxylamine was added 15 min before hydrogen peroxide as a catalase inhibitor to prevent formation of bubbles upon addition of hydrogen peroxide. X-band continuous wave EPR spectroscopy was conducted on a Bruker ESP 300 spectrometer equipped with an Oxford Instruments ESR 910 continuous helium flow cryostat. Experiments were conducted at 77 K, 9.38 GHz, 20 mW microwave power, and 5 G modulation amplitude.

**Microdilution experiments.** Minimum inhibitory concentrations (MICs) were determined as described previously.<sup>1</sup> Briefly, an overnight culture was diluted 1:500 in fresh LB medium and added to a 96-well plate containing CuCl<sub>2</sub> serially diluted two-fold in LB medium, giving a final inoculum dilution of 1:1000 ( $5 \times 10^5$  to  $1 \times 10^6$  CFU/mL). Plates were covered with AeraSeal film (Sigma-Aldrich) and incubated for 20 h at 37 °C, 200 rpm. Bacterial growth was evaluated by visual inspection corroborated by measuring the optical density at 600 nm (OD<sub>600</sub>) using a Perkin Elmer Victor<sup>3</sup> V multilabel plate reader at 0 and 20 h. The MIC was defined as the concentration at which no detectable growth occurred after 20 h of incubation. At least two biological replicates were performed with a minimum of at least four total technical replicates.

**Treatment of *E. coli* and cell lysis for proteomics.** The growth culture of *E. coli* MG1655 CTX-M-1 (OD<sub>600</sub> of 0.1–0.2) was obtained as described above for ICP-MS. The culture was then divided into 100 mL aliquots and treated with 4 μL DMSO, 10 μM CuCl<sub>2</sub> + 4 μL DMSO, 4 μM PT, 10 μM Cu + 4 μM PT, or 10 μM Cu + 4 μM PcephPT for 15 min. The cells were then centrifuged at 4000 g for 10 min at 4 °C to pellet. Pellets were washed twice with 5 mL sterile H<sub>2</sub>O and stored at -20 °C until future use.

*E. coli* cell pellets were thawed, then lysed in 200 μL of PBS (1x, without calcium or magnesium, pH 7.4) with 1 mM PMSF. Cell lysis was accomplished by sonication at 30% amplitude for 10 seconds followed by a 50 second incubation period on ice. This was performed for a total of six cycles. The lysed cells were centrifuged at 14,000 g for 15 min at 4 °C. The total protein concentration in the supernatant from each cell lysate sample was determined by a Bradford Assay and ranged from 8–12 mg/mL. Cell lysates for each condition were normalized to 8 mg/mL before analysis by pulse proteolysis.

**Protein expression workflow.** Lysates generated from the *E. coli* treatment conditions previously described were also subjected to a traditional protein expression analysis. Aliquots of each lysate containing ~80 μg of protein were diluted in PBS (1x, without calcium or magnesium, pH 7.4) and transferred to 10k molecular weight cutoff centrifugal filter unit, where a filter-aided bottom-up proteomic sample preparation with isobaric mass tag labeling was employed. This involved buffer exchanging proteins into UA (0.1 M Tris, 8 M urea, pH 8.0) and reacting each sample with 100 μL of 5 mM TCEP in UA for 1 h at room temperature and subsequently with 100 μL of 20 mM MMTS in UA for 10 min at room temperature. Samples were then buffer exchanged into 0.1 M TEAB (pH 8.5) and digested with trypsin overnight at 37 °C. The ratio of trypsin to total peptide was between 1:20 and 1:100 (w/w). The digested samples were labeled with a TMT-10plex reagent kit according to the manufacturer protocol. Labeled samples were washed with 0.5 M NaCl (3x) and centrifuged through the 10k filters. Equal volumes of each TMT10-plex labeled sample were combined into one tube. This protein expression experiment was performed on five conditions with four biological replicates each, resulting in two separate TMT10-plex

labeled samples. The final combined, labeled samples were desalted using C18 Macrospin columns prior to LC-MS/MS analysis.

**One-pot STEPP-PP workflow.** Lysates generated from the *E. coli* treatment conditions described above were subjected to a "one-pot" pulse proteolysis (PP) analysis that included a semi-tryptic peptide enrichment strategy for proteolysis procedures (STEPP).<sup>3,4</sup> The one-pot analysis employed here allowed the incorporation of two biological replicates per condition in the experiment (5 unique conditions per replicate for 10 total channels in the TMT readout). Aliquots of each lysate were distributed into a series of 12 urea-containing buffers (PBS, pH 7.4) where the final concentrations of urea were equally spaced at 0.4 M intervals between 1.0 and 5.4 M. The total amount of protein in each sample was 80 µg. The samples in the urea-containing buffers were incubated for 2 h at room temperature before 10 µg of thermolysin was added to each of the (+) and (-) ligand samples in the denaturant-containing buffers. The thermolysin proteolysis reactions proceeded for 1 min at room temperature before they were quenched upon addition of 60 µL of a urea/EDTA solution (~0.2 M EDTA, 8 M urea, pH 8.0). Equal aliquots of denaturant containing buffers from each condition in a given biological replicate were combined into a single sample, resulting in 5 combined samples representing untreated, Cu-treated, PT-treated, Cu + PT-treated, Cu + PcephPT-treated for each replicate. This ultimately generated a total of 10 samples. Aliquots containing ~90 µg of total protein from each of the 10 samples were subjected to the STEPP protocol we recently reported.<sup>3</sup> Before the STEPP protocol, an additional 20 µL of a urea/EDTA solution (~0.2 M EDTA, 8 M urea, pH 8.0) was added to each sample to ensure proper unfolding for labeling with isobaric mass tags. As part of the STEPP protocol, samples were reacted with 1.5 mM TCEP for 1 h at 30 °C and then with 2.5 mM MMTS for 10 min at room temperature. The protein material in the 10 different samples was labeled with a TMT-10plex reagent kit according to the manufacturer's protocol. The protein samples in the 10-plex were combined to generate a single protein sample that was lyophilized, re-dissolved in 2% v/v TFA, and desalted using C18 columns according to the manufacturer's protocol. The desalted sample was lyophilized, redissolved in 0.1 M TEAB solution (pH 8.5), and digested with trypsin overnight at 37 °C. The ratio of trypsin to total peptide was between 1:20 and 1:100 (w/w). NHS-activated agarose resin and 50 µL 0.5 M NaCl was added to the digested sample, such that the NHS-activated agarose resin to total peptide ratio was approximately 150:1 (w/w). Samples were reacted for 1.5 h at room temperature, acidified with 2% v/v TFA, and transferred to C18 columns for desalting prior to LC-MS/MS analysis. This pulse proteolysis experiment was performed on five conditions with four biological replicates each, resulting in two separate TMT10-plex labeled samples for LC-MS/MS analysis.

**Quantitative LC-MS/MS analysis.** The LC-MS/MS analyses were performed using a nanoAcquity UPLC system (Waters) coupled to a Thermo Orbitrap Fusion Lumos mass spectrometer system. The dried peptide material generated from the first and second PP experiments were reconstituted in 12 µL and 10 µL of 1% TFA, 2% acetonitrile in H<sub>2</sub>O, respectively. Aliquots of 1 µL and 2 µL for each experiment were injected in triplicate into the UPLC system. The dried peptide material generated from the first and second protein expression analysis were reconstituted in 30 µL and 25 µL of 1% TFA, 2% acetonitrile in H<sub>2</sub>O, respectively. Aliquots of 1 µL and 2 µL for each sample were injected in triplicate into the UPLC system. The peptides were first trapped on a Symmetry C18 20 mm x 180 µm trapping column (5 µL/min at 99.9/0.1 water/acetonitrile, v/v). The analytical separation was performed using an Acquity 75 µm x 250 mm high strength silica (HSS) T3 C18 column with a 1.8 µm particle size (Waters); the column temperature was set to 55 °C.

Peptide elution was performed using a 90 min linear gradient of 3–30 % ACN at a flow rate of 400 nL/min. The MS data was collected using a top 20 data-dependent acquisition (DDA) method which included MS1 at 120k and MS2 at 50k resolution. The MS1 AGC target was  $4.0 \times 10^5$  ions with a max injection time of 50 ms. For MS2, the AGC target was  $1.0 \times 10^5$  ions with a max injection time of 105 ms. The collision energy was set to 38%, and the scan range was 375–1500 m/z. The isolation window was 0.7 and the dynamic exclusion duration was 60 s. The mass spectrometry proteomics data have been deposited to the ProteomeXchange Consortium<sup>5</sup> via the PRIDE<sup>6</sup> partner repository with the dataset identifier PXD021198. The raw MS data are available for confidential review using the account, reviewer79333@ebi.ac.uk, and the password, bU1driKV.

**Protein expression proteomic data analysis.** Proteome Discoverer 2.2 (Thermo) was used to search the raw LC-MS/MS files against the *E. coli* MG1655 (Proteome ID: UP000000625) proteins in the 2019-09-24 release of the UniProt Knowledgebase. The raw LC-MS/MS data generated in the protein expression experiments was searched using fixed MMTS modification on cysteine; TMT10-plex labeling of lysine side chains and peptide N-termini; variable oxidation of methionine; variable deamidation of asparagine and glutamine; and variable acetylation of the protein N-terminus. Trypsin (full) was set as the enzyme, and up to two missed cleavages were allowed. For peptide and protein quantification, reporter abundance was set as intensity, normalization mode and scaling mode were each set as none. All other settings were left as the default values. Only tryptic peptides with protein FDR confidence labelled as "high" or "medium" (i.e. FDR <0.01% or <0.05%) and with at least two peptides assayed were used for subsequent analyses.

For each condition (TMT-tag), a normalization factor was calculated from the average of all the intensities for that tag. The signal intensities used in the protein expression experiments were the reporter ion intensities from all the tryptic peptides for a given protein generated in Proteome Discoverer. For each identified protein in the protein expression experiment a ratio of the observed reporter ion intensities in the (+) ligand samples (Cu, PT, PT + Cu, and PcephPT + Cu treated) to the (-) ligand sample (untreated) was generated for each biological replicate. The resulting ratio was divided by the normalization factor for each of the 4 biological replicates. These normalized ratios (fold change) were then log<sub>2</sub>-base transformed, averaged, and tested by two-tailed Student's *t*-test comparing with a mean of 0. The log<sub>2</sub>(fold change) values of all the proteins for each comparison were used to calculate the mean log<sub>2</sub>(fold change) and standard deviation ( $\sigma$ ) of its distribution. Hit proteins were identified based on two criteria, (i) the protein must have a significantly altered log<sub>2</sub>(fold change) value ( $\geq 2\sigma$  deviations from mean log<sub>2</sub>(fold change)), and (ii) the log<sub>2</sub>(fold change) value must be significantly different from zero, as determined by a Student's two-tailed *t*-test ( $p$ -value  $\leq 0.05$ ).

**One-pot STEPP-PP proteomic data analysis.** The raw LC-MS/MS data generated in the PP experiments was searched using the same allowed modifications as the protein expression data. Trypsin (semi) was set as the enzyme, and up to three missed cleavages were allowed. For peptide and protein quantification, reporter abundance was set as intensity, normalization mode and scaling mode were each set as none. All other settings were left as the default values. Only semi-tryptic peptides with protein/peptide FDR confidence labelled as "high" or "medium" (i.e. FDR <0.01% or <0.05%) were used for subsequent analyses.

For each condition (TMT-tag), a normalization factor was calculated from the average of all the intensities for that tag. The signal intensities used in the PP experiments were the reporter ion intensities from the semi-tryptic peptides generated in Proteome Discoverer. For each identified

semi-tryptic peptide in the PP experiment a ratio of the observed reporter ion intensities in the (+) ligand samples (Cu, PT, PT + Cu, and PcephPT + Cu treated) to the (-) ligand sample (untreated) was generated for each biological replicate. The resulting ratio was divided by the normalization factor for each of the four biological replicates. Due to the nature of the experiment and the possibility of expression level changes during cell treatment, changes in the levels of semi-tryptic peptides could be falsely identified as changes due to protein stability when they are in fact due to changes in protein expression. Therefore, the semi-tryptic peptide ratios generated above were divided by the protein expression ratio generated for that protein under the corresponding conditions. These final protein expression-normalized semi-tryptic peptide stability ratios (fold change) were then log<sub>2</sub>-base transformed, averaged, and subjected to a two-tailed Student's *t*-test comparing with a mean of zero. The log<sub>2</sub>(fold change) values of all the semi-tryptic peptides for each comparison were used to calculate the mean log<sub>2</sub>(fold change) and standard deviation ( $\sigma$ ) of its distribution. Hit peptides were identified based on two criteria, (i) the peptide must have a significantly altered log<sub>2</sub>(fold change) value ( $\geq 2\sigma$  deviations from mean log<sub>2</sub>(fold change)); and (ii) the log<sub>2</sub>(fold change) value must be significantly different from zero, as determined by a Student's two-tailed *t*-test ( $p$ -value  $\leq 0.05$ ).

**Fuzzy c-means cluster analysis.** Fuzzy c-means clustering is a soft clustering method first reported by Dunn in 1974.<sup>7</sup> It is commonly used in pattern recognition, in which clusters are found based on the distance or similarity of points to each other. In soft clustering methods, a data point can be a member of all the clusters or patterns identified from a data set by attributing each data point with a membership score ranging from 0 to 1. The points closer to the center of a specific cluster will have a higher membership score of belonging to that cluster. Fuzzy c-means clustering was performed in R Studio (3.6.0 (2019-04-26) – "Planting of a Tree") using the "ppclust" package. The log<sub>2</sub>(fold change) intensities of each the 407 peptide stability hits were scaled from 0 to 1 across the four treatment conditions compared to untreated. This scaling enabled the clustering method to search for trends across treatment conditions and not group peptides based on the magnitudes of their stability changes, which could be misleading. FCM was setup using the function *fcm* with 4 initial cluster centers (centers = 4) and allowed to start and iterate to a final solution ten times (nstart = 10). The output of the most optimal solution was used to group protein hits into the four clusters. Membership scores (ranging from 0 to 1) indicating how well a peptide fits into each cluster, were exported for each peptide stability hit, and peptides with scores  $\geq 0.7$  were considered as being confidently classified into one of the four clusters. Using this cutoff, ~70% of protein hits were classified into the four clusters.

**Enzyme activity assays.** For assays evaluating enzyme activity in treated bacteria, *E. coli* MG1655 expressing CTX-M-1 was grown to an OD<sub>600</sub> of 0.1–0.2, treated for 15 min, pelleted, and washed twice with 5 mL of water. The resulting pellets (100 mL cell suspension per pellet) were frozen at -20 °C for later use. Each treated pellet was lysed within 30 min of starting the activity assay in order to prevent loss of activity due to exposure to air. Pellets were lysed on ice by sonication (six cycles, 10 s pulse at 30% amplitude with 50 s rest) in 200  $\mu$ L buffer (for GAPDH, 50 mM sodium phosphate buffer, pH 7.5; for IDH, 50 mM Tris buffer, pH 7.4) and centrifuged at 14,000 g for 10 min. The resulting supernatant was diluted in the appropriate buffer to make a lysate working solution (for GAPDH, 1:50 in sodium phosphate buffer; for IDH, 1:10 in Tris buffer), which was then added to a quartz cuvette containing the appropriate assay mix. The GAPDH assay mix contained 50 mM sodium phosphate buffer (pH 7.5), 5 mM EDTA, 40 mM triethanolamine, and 2 mM NAD<sup>+</sup>. The IDH assay mix contained 50 mM Tris buffer (pH 7.4) and 0.2 mM NADP<sup>+</sup>. Lysate working solution (25  $\mu$ L) was added to the cuvette, vortexed, and used to

blank the UV-Vis. Activity was assessed by monitoring the appearance of NADH or NADPH at 340 nm every 2 min for 30 min following addition of the appropriate substrate. Spectra were collected in a quartz cuvette with 1 cm pathlength using a Varian Cary 50 UV-visible spectrophotometer. The final concentration of substrate was 2 mM DL-glyceraldehyde-3-phosphate for the GAPDH assay and 10 mM isocitrate for the IDH assay. Total reaction volume in the cuvette was 250  $\mu$ L. For all enzyme activity experiments, treated data were normalized to protein concentration and the  $A_{340}$  of the untreated condition at 30 min. At least two biological replicates were performed.

For purified GAPDH, 0.254  $\mu$ M purified GAPDH was incubated for 20 min with various concentrations of Cu in 50 mM sodium phosphate buffer (pH 7.5). A 25- $\mu$ L aliquot of treated enzyme was added to a quartz cuvette containing GAPDH assay mix as described above, vortexed, and used to blank the UV-Vis. Then 2 mM DL-glyceraldehyde-3-phosphate was added (250  $\mu$ L total reaction volume) and the absorbance at 340 nm was measured every 2 min for 30 min. For purified IDH, 31.8  $\mu$ M purified IDH was incubated for 20 min with various concentrations of Cu in 50 mM Tris buffer (pH 7.4). A 25- $\mu$ L aliquot of treated enzyme was added to a quartz cuvette containing IDH assay mix as described above, vortexed, and used to blank the UV-Vis. Then 10 mM isocitrate was added (250  $\mu$ L total reaction volume) and the absorbance at 340 nm was measured every 2 min for 30 min. At least three replicates from different days were performed for purified enzyme activity assays.

**Circular dichroism spectroscopy.** Circular dichroism spectra were obtained on an Aviv model 435 circular dichroism spectrometer equipped with a Hamilton automated titrator. The purified GAPDH CD denaturation curves were monitored at 217 nm. The CD denaturation points were set up and recorded using the automatic titration system connected to the CD instrument. In each titration, different amounts of 0 and 8–9 M urea solutions containing purified GAPDH (~0.1 mg/mL, 2.8–3.1  $\mu$ M) with and without  $\text{CuCl}_2$  (100  $\mu$ M) in phosphate buffer (pH 7.4) were mixed in different ratios to obtain the final desired urea concentration for each point. The mixing time was 1 min, CD signals were collected over the course of 5 s, and the signals were averaged. The averaged CD signals were plotted and normalized to pre- and post-transition baselines to obtain final normalized denaturation curves ( $F_{app}$ ) of GAPDH in the presence and absence of  $\text{Cu}^{2+}$ . The normalized denaturation curves were fit to a simple four point sigmoidal to estimate midpoint values. The purified IDH CD spectra were obtained over a wavelength range of 215–240 nm. A solution of IDH (0.1 mg/mL, 2.2  $\mu$ M) was incubated with and without  $\text{CuCl}_2$  (100  $\mu$ M) in phosphate buffer (pH 7.4). The solutions were allowed to sit overnight before taking the measurements. The CD signal was converted from ellipticity (in millidegrees) to molar ellipticity using the following equation:

$$[\theta] = \frac{m^o \times M}{10 \times C \times l}$$

Where,  $m^o$  is ellipticity in millidegrees,  $M$  is the average molecular weight of the protein (36,000 g/mol for GAPDH, 58,000 g/mol for IDH),  $C$  is the concentration of the sample in mg/mL, and  $l$  is the pathlength in cm.

**Safety Statement.** No unexpected or unusually high safety hazards were encountered.



## References

1. Zaengle-Barone, J. M. *et al.* Copper Influences the Antibacterial Outcomes of a  $\beta$ -Lactamase-Activated Prochelator against Drug-Resistant Bacteria. *ACS Infect. Dis.* **4**, 1019–1029 (2018).
2. Volkmer, B. & Heinemann, M. Condition-Dependent Cell Volume and Concentration of *Escherichia coli* to Facilitate Data Conversion for Systems Biology Modeling. *PLoS ONE* **6**, (2011).
3. Ma, R., Meng, H., Wiebelhaus, N. & Fitzgerald, M. C. Chemo-Selection Strategy for Limited Proteolysis Experiments on the Proteomic Scale. *Anal. Chem.* **90**, 14039–14047 (2018).
4. Cabrera, A. *et al.* Comparative Analysis of Mass-Spectrometry-Based Proteomic Methods for Protein Target Discovery Using a One-Pot Approach. *J. Am. Soc. Mass Spectrom.* **31**, 217–226 (2020).
5. Perez-Riverol, Y. *et al.* The PRIDE database and related tools and resources in 2019: improving support for quantification data. *Nucleic Acids Res.* **47**, D442–D450 (2019).
6. Deutsch, E. W. *et al.* The ProteomeXchange consortium in 2020: enabling 'big data' approaches in proteomics. *Nucleic Acids Res.* **48**, D1145–D1152 (2020).
7. Dunn, J. C. Well-Separated Clusters and Optimal Fuzzy Partitions. *J. Cybern.* **4**, 95–104 (1974).

**Supplementary Table 1 | Proteomic coverage from protein expression level and protein stability analyses.** Number of proteins and peptides assayed in the expression and stability analyses, respectively, along with the number of hit proteins and peptides under each condition (i.e. those with significant changes in their expression or stability according to the hit criteria).

| Treatment condition | Protein expression |              | Protein stability           |                         |
|---------------------|--------------------|--------------|-----------------------------|-------------------------|
|                     | Assayed proteins   | Hit proteins | Assayed peptides (proteins) | Hit peptides (proteins) |
| Cu                  | 898                | 8            | 4605 (584)                  | 55 (37)                 |
| PT                  | 898                | 36           | 4605 (584)                  | 167 (69)                |
| Cu + PcephPT        | 898                | 20           | 4605 (584)                  | 170 (84)                |
| Cu + PT             | 898                | 24           | 4605 (584)                  | 144 (74)                |

**Supplementary Table 2 | Complete list of protein expression level hits.** Cumulative list of protein hits with significant treatment-induced expression level changes identified in this work.

| <b>Accession number</b> | <b>Protein name</b>                                 | <b>Gene code</b> |
|-------------------------|-----------------------------------------------------|------------------|
| P25516                  | Aconitate hydratase A                               | acnA             |
| P0A9Q9                  | Aspartate-semialdehyde dehydrogenase                | asd              |
| P0ABH9                  | ATP-dependent Clp protease ATP-binding subunit ClpA | clpA             |
| P63284                  | Chaperone protein ClpB                              | clpB             |
| Q59385                  | Copper-exporting P-type ATPase                      | copA             |
| P24251                  | Sigma factor-binding protein Crl                    | crl              |
| P36649                  | Blue copper oxidase CueO                            | cueO             |
| P0ABJ1                  | Cytochrome bo(3) ubiquinol oxidase subunit 2        | cyoA             |
| P0ABK5                  | Cysteine synthase A                                 | cysK             |
| P16703                  | Cysteine synthase B                                 | cysM             |
| P0A6K3                  | Peptide deformylase                                 | def              |
| P0A6Y8                  | Chaperone protein DnaK                              | dnaK             |
| P0ADI4                  | Enterobactin synthase component B                   | entB             |
| P0AEJ2                  | Isochorismate synthase EntC                         | entC             |
| P11454                  | Enterobactin synthase component F                   | entF             |
| P75780                  | Catecholate siderophore receptor Fiu                | fiu              |
| P05042                  | Fumarate hydratase class II                         | fumC             |
| P09148                  | Galactose-1-phosphate uridylyltransferase           | galT             |
| P33195                  | Glycine dehydrogenase (decarboxylating)             | gcvP             |
| P27248                  | Aminomethyltransferase                              | gcvT             |
| P68066                  | Autonomous glycy radical cofactor                   | grcA             |
| P0A6F9                  | 10 kDa chaperonin                                   | groS             |
| P68688                  | Glutaredoxin 1                                      | grxA             |
| P04425                  | Glutathione synthetase                              | gshB             |
| P60560                  | GMP reductase                                       | guaC             |
| P0A6Z3                  | Chaperone protein HtpG                              | htpG             |
| P0C054                  | Small heat shock protein IbpA                       | ibpA             |
| P0C058                  | Small heat shock protein IbpB                       | ibpB             |
| P27294                  | Protein InaA                                        | inaA             |
| P0AAC8                  | Iron-binding protein IscA                           | iscA             |
| P0AGK8                  | HTH-type transcriptional regulator IscR             | iscR             |
| P0A6B7                  | Cysteine desulfurase IscS                           | iscS             |
| P0ACD4                  | Iron-sulfur cluster assembly scaffold protein IscU  | iscU             |
| P13029                  | Catalase-peroxidase                                 | katG             |
| P0A725                  | UDP-3-O-acyl-N-acetylglucosamine deacetylase        | lpxC             |
| P0AEY5                  | Modulator of drug activity B                        | mdaB             |
| P0AF18                  | N-acetylglucosamine-6-phosphate deacetylase         | nagA             |
| P77258                  | N-ethylmaleimide reductase                          | nema             |
| P17117                  | Oxygen-insensitive NADPH nitroreductase             | nfsA             |
| P38489                  | Oxygen-insensitive NAD(P)H nitroreductase           | nfsB             |

|        |                                                       |      |
|--------|-------------------------------------------------------|------|
| P52697 | 6-phosphogluconolactonase                             | pgl  |
| P0A9J8 | Bifunctional chorismate mutase/prephenate dehydratase | pheA |
| P0C037 | Pyrimidine/purine nucleoside phosphorylase            | ppnP |
| P36999 | 23S rRNA (guanine(745)-1-methyltransferase            | rlmA |
| P0A7P5 | 50S ribosomal protein L34                             | rpmH |
| P0A9T0 | D-3-phosphoglycerate dehydrogenase                    | serA |
| P27306 | Soluble pyridine nucleotide transhydrogenase          | sthA |
| P0A9T4 | Protein tas                                           | tas  |
| P0A877 | Tryptophan synthase alpha chain                       | trpA |
| P33030 | Zinc-binding GTPase YeiR                              | yeiR |
| P0ADV5 | Luciferase-like monooxygenase                         | yhbW |
| P76116 | Uncharacterized protein YncE                          | yncE |
| P37617 | Zinc/cadmium/lead-transporting P-type ATPase          | zntA |

**Supplementary Table 3 | Complete list of protein stability hits.** Cumulative list of protein hits with significant treatment-induced stability changes identified in this work.

| Accession number | Protein name                                                                              | Gene code |
|------------------|-------------------------------------------------------------------------------------------|-----------|
| P0ABD8           | Biotin carboxyl carrier protein of acetyl-CoA carboxylase                                 | accB      |
| P08997           | Malate synthase A                                                                         | aceB      |
| P0AFG8           | Pyruvate dehydrogenase E1 component                                                       | aceE      |
| P06959           | Dihydrolipoyllysine-residue acetyltransferase component of pyruvate dehydrogenase complex | aceF      |
| P0A6A3           | Acetate kinase                                                                            | ackA      |
| P25516           | Aconitate hydratase A                                                                     | acnA      |
| P36683           | Aconitate hydratase B                                                                     | acnB      |
| P0A6A8           | Acyl carrier protein                                                                      | acpP      |
| P0AE08           | Alkyl hydroperoxide reductase C                                                           | ahpC      |
| P35340           | Alkyl hydroperoxide reductase subunit F                                                   | ahpF      |
| P0A6D7           | Shikimate kinase 1                                                                        | aroK      |
| P0A9Q9           | Aspartate-semialdehyde dehydrogenase                                                      | asd       |
| P0A8M0           | Asparagine--tRNA ligase                                                                   | asnS      |
| P0ABB4           | ATP synthase subunit beta                                                                 | atpD      |
| P17445           | NAD/NADP-dependent betaine aldehyde dehydrogenase                                         | betB      |
| P63284           | Chaperone protein ClpB                                                                    | clpB      |
| Q59385           | Copper-exporting P-type ATPase                                                            | copA      |
| P0A9X9           | Cold shock protein CspA                                                                   | cspA      |
| P0A972           | Cold shock-like protein CspE                                                              | cspE      |
| P36649           | Blue copper oxidase CueO                                                                  | cueO      |
| P0ABK5           | Cysteine synthase A                                                                       | cysK      |
| P0AEB2           | D-alanyl-D-alanine carboxypeptidase DacA                                                  | dacA      |
| P0A6K3           | Peptide deformylase                                                                       | def       |
| P0A6Y8           | Chaperone protein DnaK                                                                    | dnaK      |
| P0A953           | 3-oxoacyl-[acyl-carrier-protein] synthase 1                                               | fabB      |
| P0AEK4           | Enoyl-[acyl-carrier-protein] reductase [NADH] FabI                                        | fabI      |
| P0A805           | Ribosome-recycling factor                                                                 | frf       |
| P0AAB6           | UTP--glucose-1-phosphate uridylyltransferase                                              | galF      |
| P0A9B2           | Glyceraldehyde-3-phosphate dehydrogenase A                                                | gapA      |
| P00960           | Glycine--tRNA ligase alpha subunit                                                        | glyQ      |
| P62707           | 2,3-bisphosphoglycerate-dependent phosphoglycerate mutase                                 | gpmA      |
| P37689           | 2,3-bisphosphoglycerate-independent phosphoglycerate mutase                               | gpmI      |
| P68066           | Autonomous glycyl radical cofactor                                                        | grcA      |
| P0A6F5           | 60 kDa chaperonin                                                                         | groL      |
| P0A6F9           | 10 kDa chaperonin                                                                         | groS      |
| P09372           | Protein GrpE                                                                              | grpE      |
| P68688           | Glutaredoxin 1                                                                            | grxA      |
| P0AC62           | Glutaredoxin 3                                                                            | grxC      |
| P0AC69           | Glutaredoxin 4                                                                            | grxD      |
| P04425           | Glutathione synthetase                                                                    | gshB      |

|        |                                                             |      |
|--------|-------------------------------------------------------------|------|
| P60560 | GMP reductase                                               | guaC |
| P0ACB2 | Delta-aminolevulinic acid dehydratase                       | hemB |
| P67910 | ADP-L-glycero-D-manno-heptose-6-epimerase                   | hldD |
| P0ACF8 | DNA-binding protein H-NS                                    | hns  |
| P0A9M2 | Hypoxanthine phosphoribosyltransferase                      | hpt  |
| P0A6Z1 | Chaperone protein HscA                                      | hscA |
| P0A6H5 | ATP-dependent protease ATPase subunit HslU                  | hslU |
| P0A7B8 | ATP-dependent protease subunit HslV                         | hslV |
| P0A6Z3 | Chaperone protein HtpG                                      | htpG |
| P0ACF0 | DNA-binding protein HU-alpha                                | hupA |
| P0C054 | Small heat shock protein IbpA                               | ibpA |
| P0C058 | Small heat shock protein IbpB                               | ibpB |
| P08200 | Isocitrate dehydrogenase [NADP]                             | icd  |
| P27294 | Protein InaA                                                | inaA |
| P0A705 | Translation initiation factor IF-2                          | infB |
| P0AGK8 | HTH-type transcriptional regulator IscR                     | iscR |
| P0A6B7 | Cysteine desulfurase IscS                                   | iscS |
| P60716 | Lipoyl synthase                                             | lipA |
| P0A9M0 | Lon protease                                                | lon  |
| P0A8N3 | Lysine--tRNA ligase                                         | lysS |
| P26616 | NAD-dependent malic enzyme                                  | maeA |
| P0AE18 | Methionine aminopeptidase                                   | map  |
| P61889 | Malate dehydrogenase                                        | mdh  |
| P0A817 | S-adenosylmethionine synthase                               | metK |
| P09424 | Mannitol-1-phosphate 5-dehydrogenase                        | mtlD |
| P0AFF6 | Transcription termination/antitermination protein NusA      | nusA |
| P31663 | Pantothenate synthetase                                     | panC |
| P22259 | Phosphoenolpyruvate carboxykinase (ATP)                     | pckA |
| P37095 | Peptidase B                                                 | pepB |
| P15288 | Cytosol non-specific dipeptidase                            | pepD |
| P04825 | Aminopeptidase N                                            | pepN |
| P09373 | Formate acetyltransferase 1                                 | pflB |
| P05055 | Polyribonucleotide nucleotidyltransferase                   | pnp  |
| P00864 | Phosphoenolpyruvate carboxylase                             | ppc  |
| P0A7I4 | Peptide chain release factor RF3                            | prfC |
| P45577 | RNA chaperone ProQ                                          | proQ |
| P0AFM2 | Glycine betaine/proline betaine-binding periplasmic protein | proX |
| P0A9M8 | Phosphate acetyltransferase                                 | pta  |
| P08839 | Phosphoenolpyruvate-protein phosphotransferase              | ptsl |
| P0A7D4 | Adenylosuccinate synthetase                                 | purA |
| P0AD61 | Pyruvate kinase I                                           | pykF |
| P0AG30 | Transcription termination factor Rho                        | rho  |
| P0A7J0 | 3,4-dihydroxy-2-butanone 4-phosphate synthase               | ribB |
| P0AFU8 | Riboflavin synthase                                         | ribC |
| P61714 | 6,7-dimethyl-8-ribityllumazine synthase                     | ribE |

|        |                                                  |      |
|--------|--------------------------------------------------|------|
| P0AEI4 | Ribosomal protein S12 methylthiotransferase RimO | rimO |
| P0C0R7 | Ribosomal RNA large subunit methyltransferase E  | rlmE |
| P0A7L0 | 50S ribosomal protein L1                         | rplA |
| P60422 | 50S ribosomal protein L2                         | rplB |
| P60438 | 50S ribosomal protein L3                         | rplC |
| P60723 | 50S ribosomal protein L4                         | rplD |
| P62399 | 50S ribosomal protein L5                         | rplE |
| P0AG55 | 50S ribosomal protein L6                         | rplF |
| P0A7R1 | 50S ribosomal protein L9                         | rplI |
| P0A7J3 | 50S ribosomal protein L10                        | rplJ |
| P0A7J7 | 50S ribosomal protein L11                        | rplK |
| P0ADY3 | 50S ribosomal protein L14                        | rplN |
| P02413 | 50S ribosomal protein L15                        | rplO |
| P0AG44 | 50S ribosomal protein L17                        | rplQ |
| P0C018 | 50S ribosomal protein L18                        | rplR |
| P0A7K6 | 50S ribosomal protein L19                        | rplS |
| P0A7L3 | 50S ribosomal protein L20                        | rplT |
| P61175 | 50S ribosomal protein L22                        | rplV |
| P0ADZ0 | 50S ribosomal protein L23                        | rplW |
| P60624 | 50S ribosomal protein L24                        | rplX |
| P68919 | 50S ribosomal protein L25                        | rplY |
| P0A7L8 | 50S ribosomal protein L27                        | rpmA |
| P0A7M2 | 50S ribosomal protein L28                        | rpmB |
| P0AG51 | 50S ribosomal protein L30                        | rpmD |
| P0A7M9 | 50S ribosomal protein L31                        | rpmE |
| P0A7N9 | 50S ribosomal protein L33                        | rpmG |
| P0A7P5 | 50S ribosomal protein L34                        | rpmH |
| P0A7Z4 | DNA-directed RNA polymerase subunit alpha        | rpoA |
| P0A8V2 | DNA-directed RNA polymerase subunit beta         | rpoB |
| P0A8T7 | DNA-directed RNA polymerase subunit beta'        | rpoC |
| P0AG67 | 30S ribosomal protein S1                         | rpsA |
| P0A7V0 | 30S ribosomal protein S2                         | rpsB |
| P0A7V3 | 30S ribosomal protein S3                         | rpsC |
| P0A7V8 | 30S ribosomal protein S4                         | rpsD |
| P0A7W1 | 30S ribosomal protein S5                         | rpsE |
| P02358 | 30S ribosomal protein S6                         | rpsF |
| P02359 | 30S ribosomal protein S7                         | rpsG |
| P0A7W7 | 30S ribosomal protein S8                         | rpsH |
| P0A7X3 | 30S ribosomal protein S9                         | rpsI |
| P0A7R5 | 30S ribosomal protein S10                        | rpsJ |
| P0A7R9 | 30S ribosomal protein S11                        | rpsK |
| P0A7S3 | 30S ribosomal protein S12                        | rpsL |
| P0A7S9 | 30S ribosomal protein S13                        | rpsM |
| P0AG59 | 30S ribosomal protein S14                        | rpsN |
| P0ADZ4 | 30S ribosomal protein S15                        | rpsO |

|        |                                                                                                   |      |
|--------|---------------------------------------------------------------------------------------------------|------|
| P0AG63 | 30S ribosomal protein S17                                                                         | rpsQ |
| P0A7U7 | 30S ribosomal protein S20                                                                         | rpsT |
| P68679 | 30S ribosomal protein S21                                                                         | rpsU |
| P0AC41 | Succinate dehydrogenase flavoprotein subunit                                                      | sdhA |
| P0AG86 | Protein-export protein SecB                                                                       | secB |
| P16456 | Selenide, water dikinase                                                                          | selD |
| P0A8L1 | Serine--tRNA ligase                                                                               | serS |
| P0A9K9 | FKBP-type peptidyl-prolyl cis-trans isomerase SlyD                                                | slyD |
| P0ACG1 | DNA-binding protein StpA                                                                          | stpA |
| P0AFG3 | 2-oxoglutarate dehydrogenase E1 component                                                         | sucA |
| P0AFG6 | Dihydrolipoyllysine-residue succinyltransferase component of 2-oxoglutarate dehydrogenase complex | sucB |
| P69428 | Sec-independent protein translocase protein Tata                                                  | tatA |
| P0A8M3 | Threonine--tRNA ligase                                                                            | thrS |
| P0A850 | Trigger factor                                                                                    | tig  |
| P0A853 | Tryptophanase                                                                                     | tnaA |
| P0A862 | Thiol peroxidase                                                                                  | tpx  |
| P0A6P1 | Elongation factor Ts                                                                              | tsf  |
| P0A890 | Sulfur carrier protein TusA                                                                       | tusA |
| P07118 | Valine--tRNA ligase                                                                               | valS |
| P0A8J4 | UPF0250 protein YbeD                                                                              | ybeD |
| P0A9U3 | Uncharacterized ABC transporter ATP-binding protein YbiT                                          | ybiT |
| P29217 | UPF0502 protein YceH                                                                              | yceH |
| P0ABU2 | Ribosome-binding ATPase YchF                                                                      | ychF |
| P0A8M6 | UPF0265 protein YeeX                                                                              | yeeX |
| P0A6N8 | Elongation factor P-like protein                                                                  | yeiP |
| P0ADV5 | Luciferase-like monooxygenase                                                                     | yhbW |
| P76116 | Uncharacterized protein YncE                                                                      | yncE |
| Q46856 | Alcohol dehydrogenase YqhD                                                                        | yqhD |
| P37617 | Zinc/cadmium/lead-transporting P-type ATPase                                                      | zntA |



**Supplementary Table 4 | Biological process classification of protein stability hits.** Stability hit peptides in each condition were sorted into categories based on their GO biological process terms extracted using DAVID functional analysis and more generally classified into GO Term categories.

| Category                     | # of hit peptides (proteins) |                 |                 |                 |                  |
|------------------------------|------------------------------|-----------------|-----------------|-----------------|------------------|
|                              | Cu                           | PT              | Cu + PcephPT    | Cu + PT         | Total            |
| Metal detoxification         | 5 (2)                        | 5 (3)           | 4 (2)           | 7 (3)           | 8 (3)            |
| Fe-S cluster synthesis       | 1 (1)                        | 3 (1)           | 3 (1)           | 2 (1)           | 5 (2)            |
| Glycolysis and TCA cycle     | 4 (4)                        | 10 (7)          | 8 (7)           | 15 (8)          | 28 (15)          |
| Biosynthetic processes       | 3 (3)                        | 15 (9)          | 6 (5)           | 12 (11)         | 31 (23)          |
| Metabolic processes (other)  | 3 (3)                        | 4 (3)           | 4 (4)           | 7 (5)           | 14 (12)          |
| Transcription                | 14 (6)                       | 18 (5)          | 15 (7)          | 14 (6)          | 36 (11)          |
| Translation (ribosome)       | 18 (11)                      | 49 (21)         | 114 (36)        | 58 (21)         | 170 (44)         |
| Translation (other)          | 2 (2)                        | 1 (1)           | 11 (9)          | 5 (4)           | 16 (13)          |
| Unfolded protein response    | 1 (1)                        | 55 (6)          | 3 (3)           | 10 (5)          | 60 (10)          |
| Peptide degradation          | 0 (0)                        | 8 (4)           | 3 (2)           | 7 (3)           | 9 (4)            |
| Cell redox homeostasis       | 1 (1)                        | 4 (3)           | 3 (2)           | 8 (5)           | 13 (8)           |
| Stress response              | 2 (2)                        | 5 (3)           | 1 (1)           | 1 (1)           | 8 (5)            |
| Other/unknown classification | 1 (1)                        | 3 (3)           | 5 (5)           | 1 (1)           | 9 (9)            |
| <b>Total hits</b>            | <b>55 (37)</b>               | <b>180 (69)</b> | <b>180 (84)</b> | <b>147 (74)</b> | <b>407 (159)</b> |

**Supplementary Table 5 | Biological process classification of protein stability hits within each cluster.** Stability hit peptides within each cluster were sorted into categories based on their GO biological process terms extracted using DAVID functional analysis and more generally classified into GO Trim term categories.

| Cluster                      | # of hit peptides (proteins)    |                                        |                                 |                                   | Total classified |
|------------------------------|---------------------------------|----------------------------------------|---------------------------------|-----------------------------------|------------------|
|                              | Cluster 1<br>(Cu-Driven, Stab.) | Cluster 2<br>(PcephPT-Driven, Destab.) | Cluster 3<br>(PT-Driven, Stab.) | Cluster 4<br>(PT-Driven, Destab.) |                  |
| Metal detoxification         | 2 (1)                           | 0 (0)                                  | 1 (1)                           | 0 (0)                             | 3 (2)            |
| Fe-S cluster synthesis       | 0 (0)                           | 0 (0)                                  | 0 (0)                           | 1 (1)                             | 1 (1)            |
| Glycolysis and TCA cycle     | 10 (6)                          | 3 (3)                                  | 1 (1)                           | 2 (2)                             | 16 (11)          |
| Biosynthetic processes       | 2 (2)                           | 3 (3)                                  | 4 (3)                           | 6 (5)                             | 15 (13)          |
| Metabolic processes (other)  | 0 (0)                           | 2 (2)                                  | 0 (0)                           | 2 (2)                             | 4 (4)            |
| Transcription                | 2 (2)                           | 7 (6)                                  | 7 (1)                           | 2 (2)                             | 18 (9)           |
| Unfolded protein response    | 2 (2)                           | 2 (2)                                  | 36 (3)                          | 1 (1)                             | 41 (7)           |
| Peptide degradation          | 1 (1)                           | 0 (0)                                  | 4 (3)                           | 0 (0)                             | 5 (3)            |
| Translation (ribosome)       | 28 (10)                         | 61 (18)                                | 2 (2)                           | 23 (13)                           | 114 (34)         |
| Translation (other)          | 4 (3)                           | 8 (6)                                  | 0 (0)                           | 1 (1)                             | 13 (10)          |
| Cell redox homeostasis       | 5 (4)                           | 1 (1)                                  | 3 (2)                           | 0 (0)                             | 9 (7)            |
| Stress response              | 0 (0)                           | 1 (1)                                  | 2 (1)                           | 2 (2)                             | 5 (3)            |
| Other/unknown classification | 0 (0)                           | 3 (3)                                  | 1 (1)                           | 1 (1)                             | 5 (5)            |
| <b>Total hits</b>            | <b>56 (31)</b>                  | <b>91 (46)</b>                         | <b>61 (18)</b>                  | <b>41 (30)</b>                    | <b>249 (109)</b> |

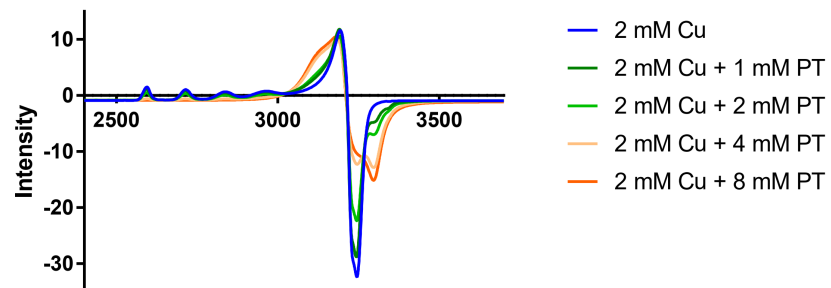

**Supplementary Figure 1 | Electron paramagnetic resonance spectroscopy of Cu titrated with PT in 10% glycerol.**

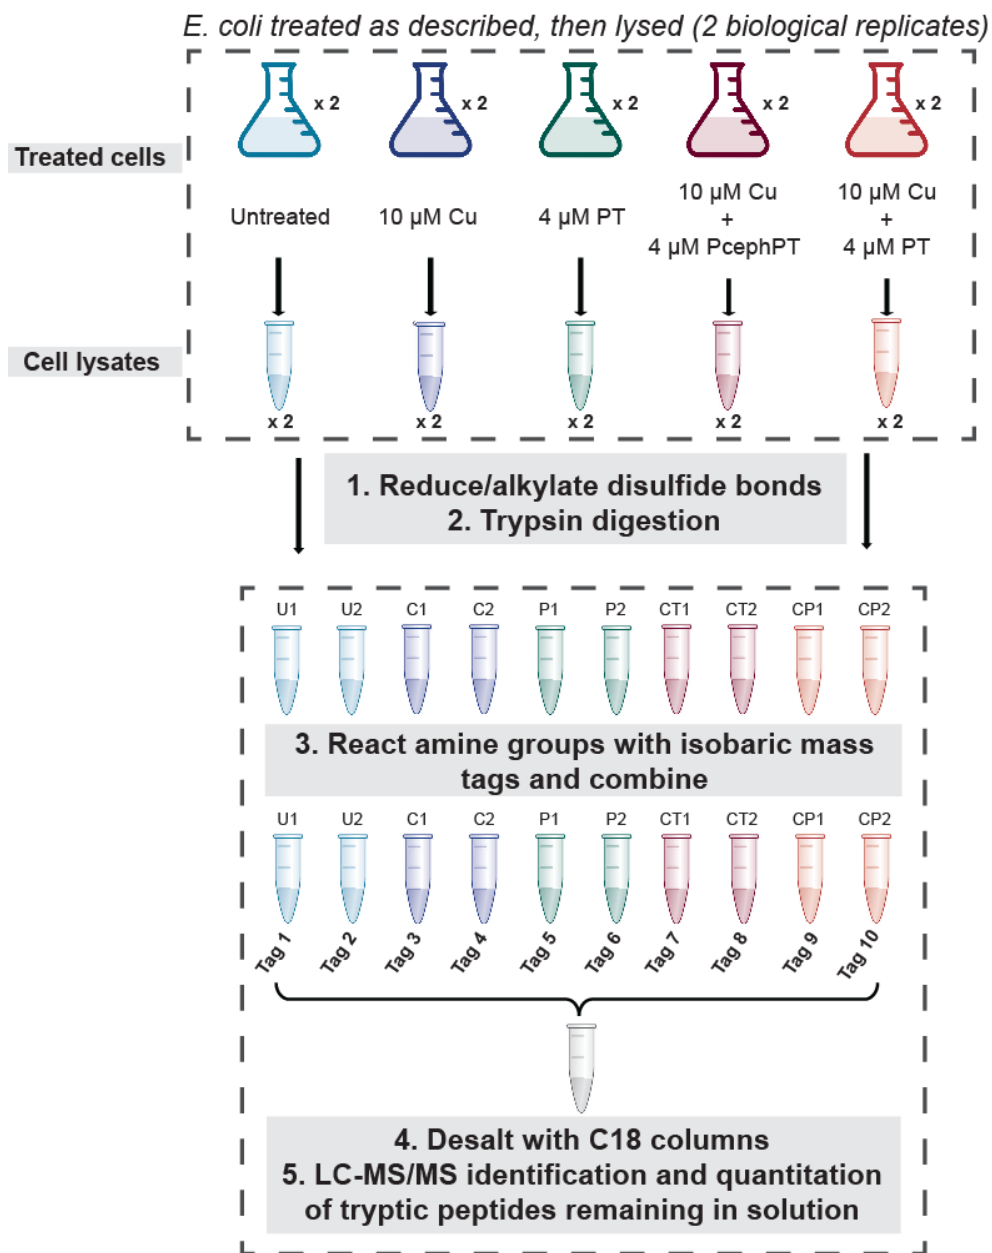

**Supplementary Figure 2 | Experimental workflow and isobaric mass tagging scheme for protein expression analysis.** The above workflow was performed twice to generate a total of four biological replicates.

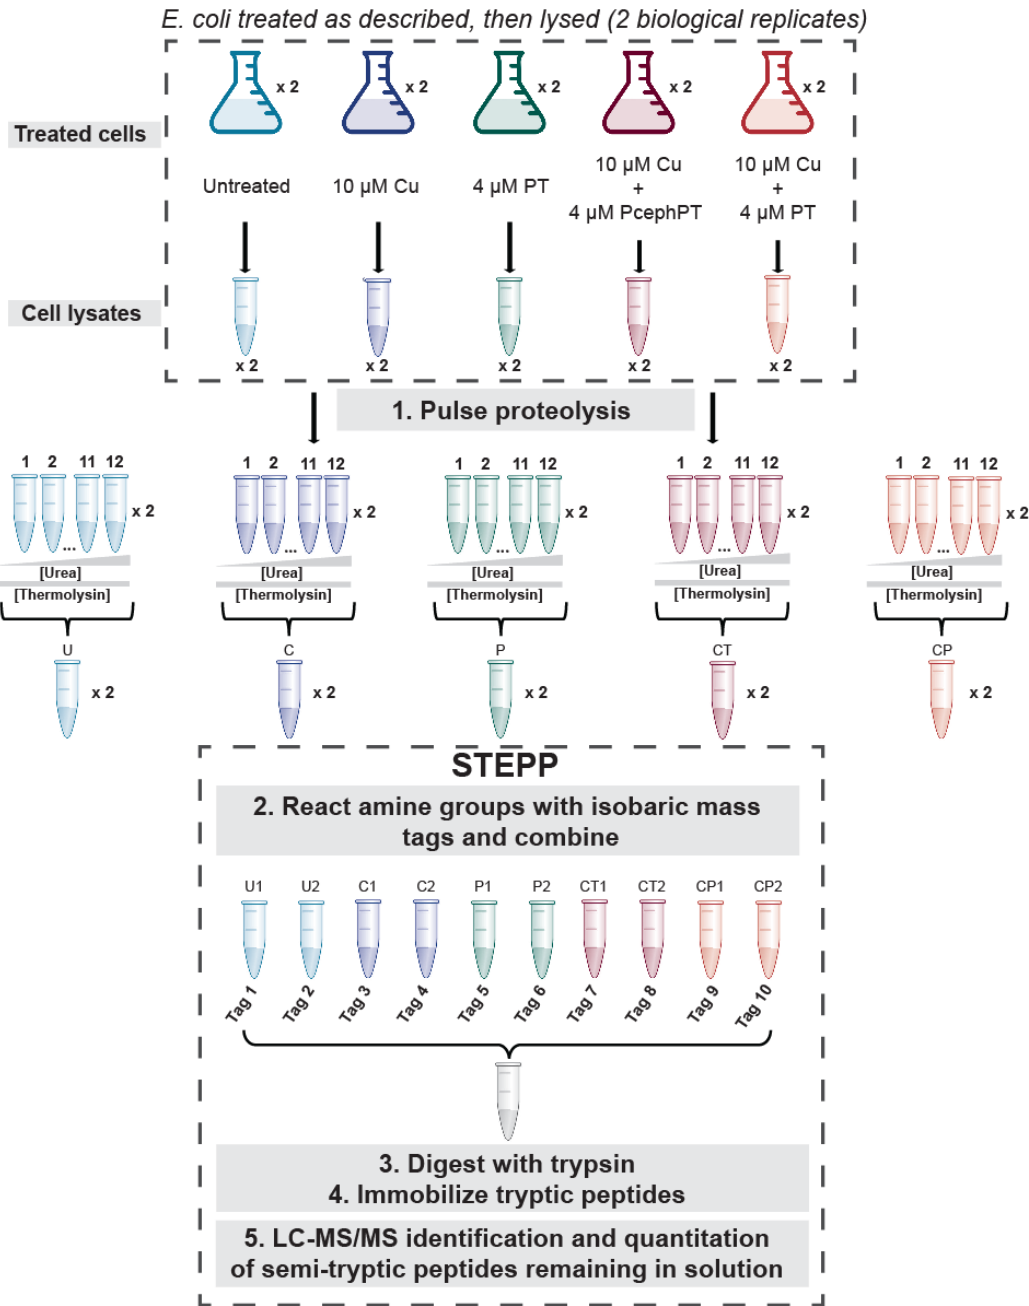

**Supplementary Figure 3 | Experimental workflow and isobaric mass tagging scheme for protein stability analysis.** The above workflow was performed twice to generate a total of four biological replicates.

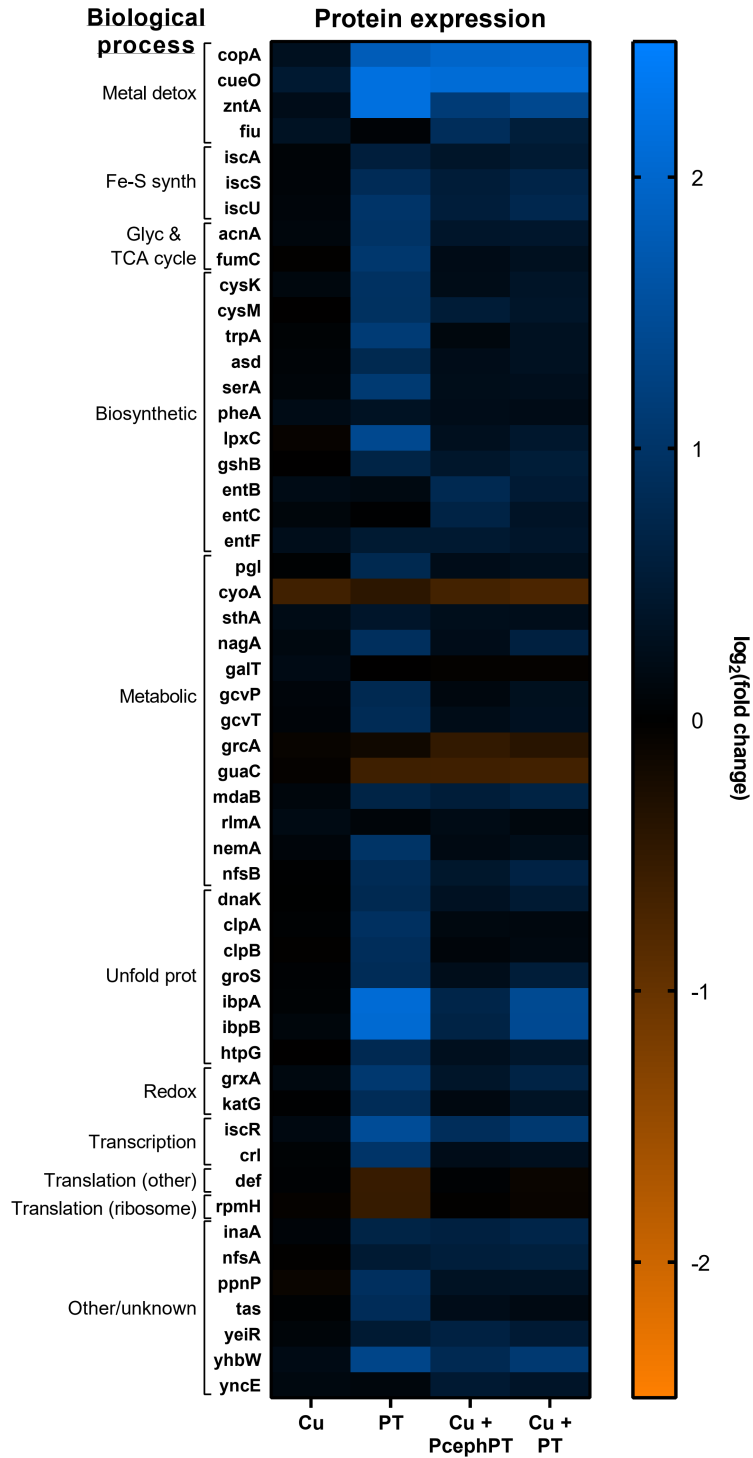

**Supplementary Figure 4 | Heat map visualizing magnitude of expression changes for hit proteins grouped by biological process.** Heat map displaying the log<sub>2</sub>(fold change) in expression level of proteins that were hits in at least one treatment condition. The same data are shown in the volcano plot (**Figure 3**). Positive values (blue) indicate increased expression, while negative values (orange) indicate decreased expression compared to the untreated condition. Proteins are identified by their corresponding gene codes.

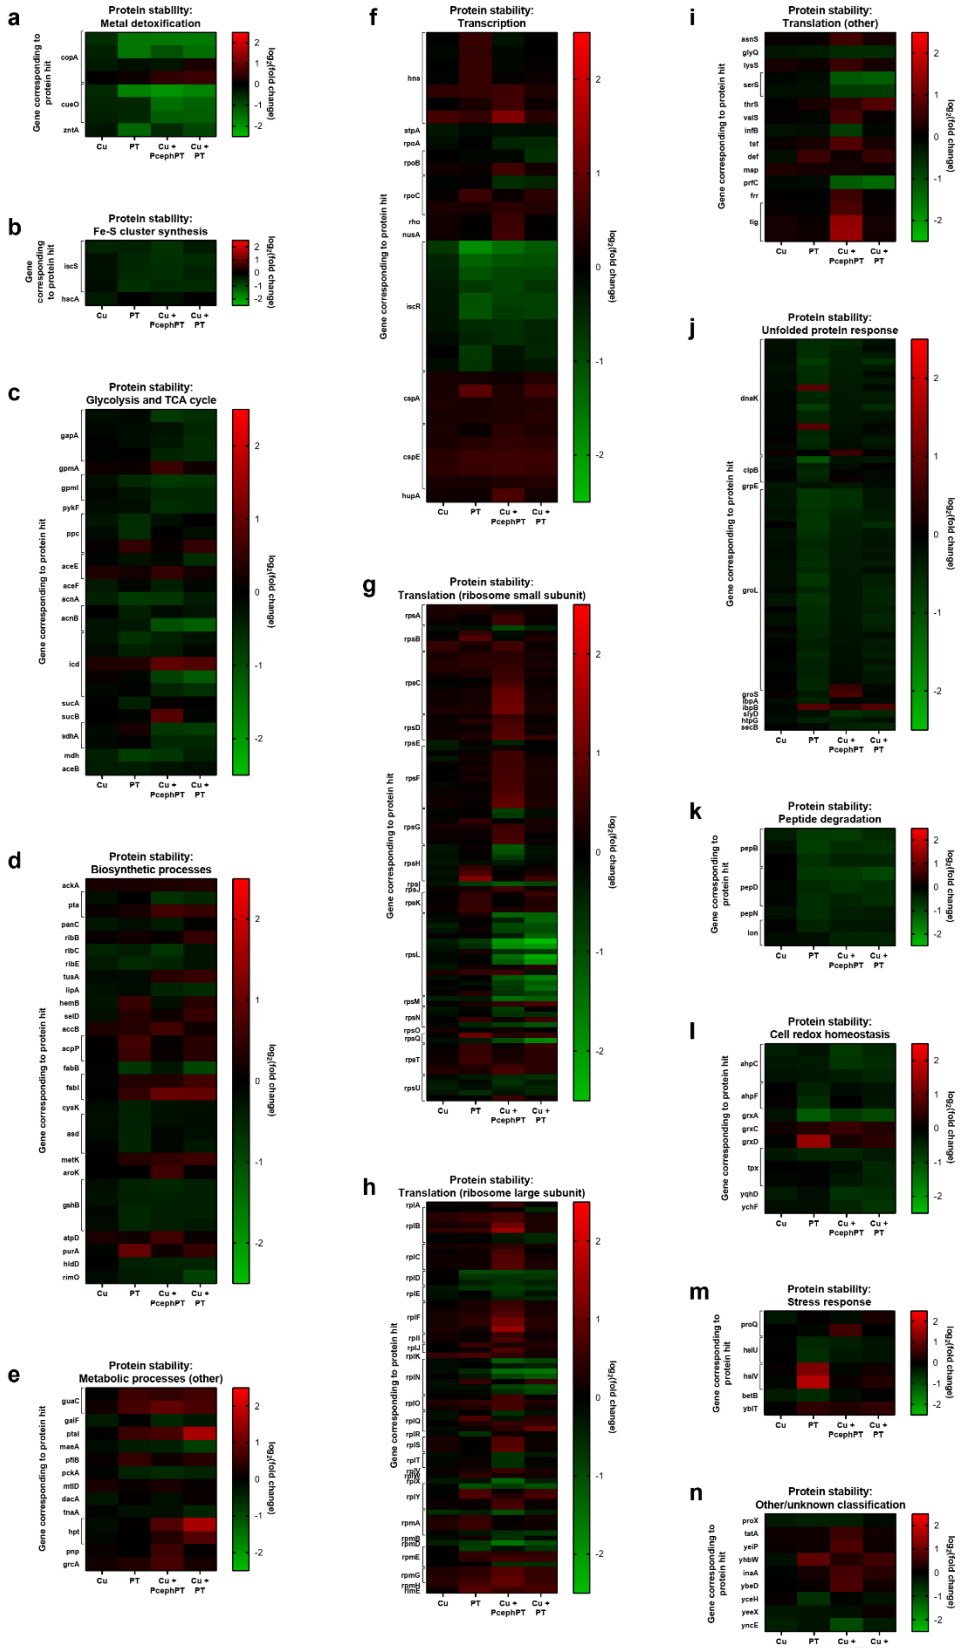

**Supplementary Figure 5 | Heat maps visualizing magnitude of stability changes for hit peptides grouped by biological process.** Heat maps displaying the  $\log_2(\text{fold change})$  in stability of peptides that were hits in at least one treatment condition. Negative values (green) indicate increased stability, while positive values (red) indicate decreased stability compared to the untreated condition. Proteins are identified by their corresponding gene codes.

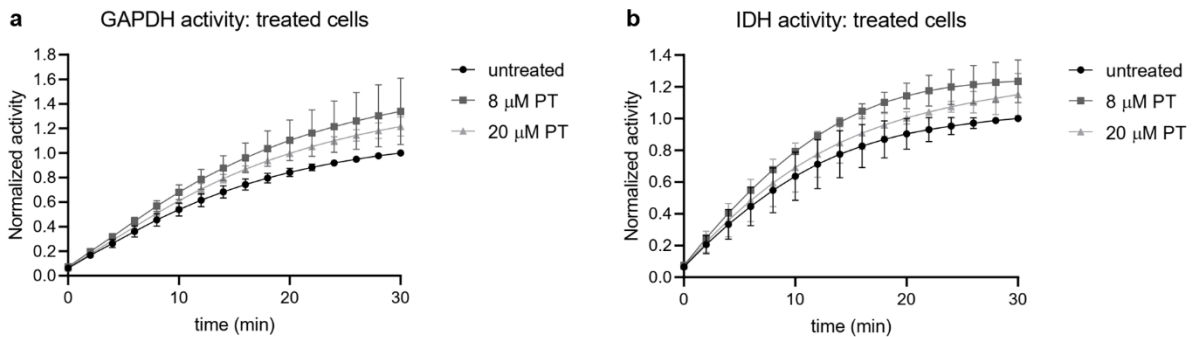

**Supplementary Figure 6 | GAPDH and IDH activity in cells treated with PT.** **a**, Activity of GAPDH measured in cell lysates of *E. coli* treated for 15 min as indicated; **b**, activity of IDH measured in cell lysates of *E. coli* treated for 15 min as indicated.
